# Supplementary material for: Highly efficient formaldehyde elimination over meso-structured M/CeO2 (M = Pd, Pt, Au and Ag) catalyst under ambient conditions
Source: Royal Society of Chemistry journal article supplement (doi:10.1039/c5ra04928h), 2015-01-01
Supplement: c5ra04928h1.pdf [file c5ra04928h1.pdf]

# Highly Efficient Formaldehyde Elimination over Mesoporous M/CeO<sub>2</sub> (M = Pd, Pt, Au and Ag) Catalyst under Ambient Condition

Gengnan Li and Liang Li\*

Key Laboratory for Ultrafine Materials of Ministry of Education, School of Materials Science and Engineering, East China University of Science and Technology, Shanghai 20+86-21-64250740

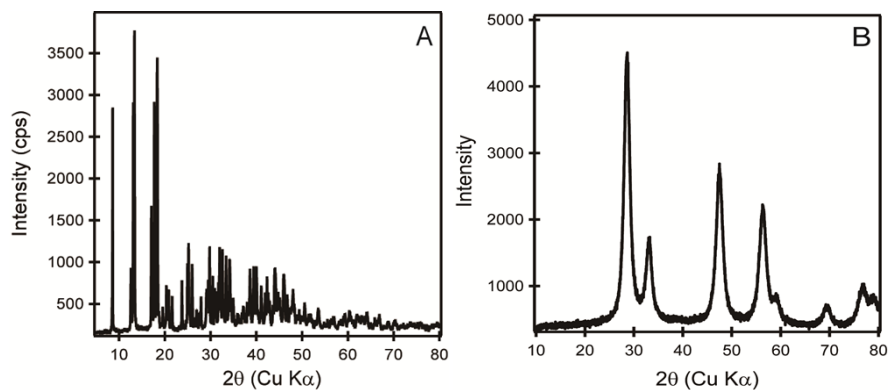

Fig. S1 The XRD patterns of Ce<sub>2</sub>(C<sub>2</sub>O<sub>4</sub>)<sub>3</sub>·2H<sub>2</sub>O precursor (A) and CeO<sub>2</sub> support (B).

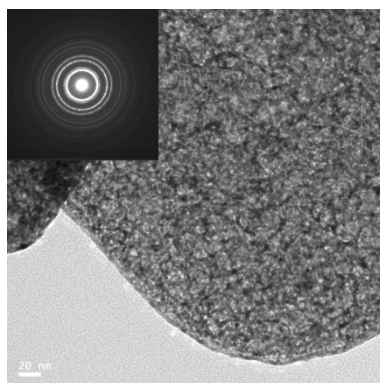

Fig. S2 The TEM image of CeO<sub>2</sub> support.

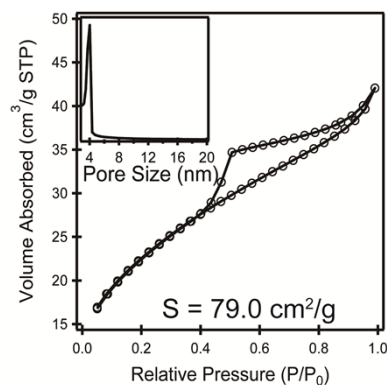

Fig. S3 N<sub>2</sub> adsorption-desorption isotherm of the CeO<sub>2</sub> support.

**Table S1** Surface composition of the samples

| Sample                       | Ce                      |                         | O                |                   | Noble metal |              |
|------------------------------|-------------------------|-------------------------|------------------|-------------------|-------------|--------------|
|                              | Ce <sup>3+</sup><br>(%) | Ce <sup>4+</sup><br>(%) | Lattice O<br>(%) | Absorbed O<br>(%) | Ion<br>(%)  | Metal<br>(%) |
| CeO <sub>2</sub>             | 10.5                    | 20.7                    | 56.4             | 12.4              | -           | -            |
| 0.78 wt% Pd/CeO <sub>2</sub> | 12.1                    | 18.1                    | 53.1             | 16.5              | < 0.1       | 0.2          |
| 1.00 wt% Pt/CeO <sub>2</sub> | 12.1                    | 17.8                    | 52.7             | 16.9              | < 0.1       | 0.5          |
| 0.92 wt% Au/CeO <sub>2</sub> | 11.6                    | 17.9                    | 55.7             | 14.5              | < 0.1       | 0.3          |
| 0.98 wt% Ag/CeO <sub>2</sub> | 10.5                    | 19.2                    | 55.5             | 13.9              | ~ 0         | 0.9          |

**Table S2** Comparison of the catalyst performance over different noble-metal supported catalysts for formaldehyde oxidation reported previously

| Catalyst            | Noble metal loading (wt%) | HCHO concentration (ppm) | Space velocity (h <sup>-1</sup> ) | Temperature of 100% HCHO conversion (°C) | TOFat 100% conversion temperature (10 <sup>-3</sup> S <sup>-1</sup> ) | Note      |
|---------------------|---------------------------|--------------------------|-----------------------------------|------------------------------------------|-----------------------------------------------------------------------|-----------|
| Pd/CeO <sub>2</sub> | 0.78                      | 600                      | 120,000                           | 22                                       | 2.84                                                                  | This work |
| Pd/TiO <sub>2</sub> | 1.0                       | 10                       | 120,000                           | ~25                                      | 0.398                                                                 | Ref. 16   |
| Pt/CeO <sub>2</sub> | 1.0                       | 600                      | 120,000                           | < 20                                     | 4.03                                                                  | This work |
| Pt/TiO <sub>2</sub> | 1.0                       | 100                      | 50,000                            | < 20                                     | /                                                                     | Ref. 5    |
| Au/CeO <sub>2</sub> | 0.92                      | 600                      | 120,000                           | 28                                       | 4.34                                                                  | This work |
| Au/CeO <sub>2</sub> | 0.56                      | 600                      | 66,000                            | 75                                       | /                                                                     | Ref. 7    |
| Au/CeO <sub>2</sub> | 1.0                       | 80                       | 134,000                           | 25                                       | 1.78                                                                  | Ref. 8    |
| Ag/CeO <sub>2</sub> | 0.98                      | 600                      | 120,000                           | 100                                      | 1.80                                                                  | This work |
| Ag/CeO <sub>2</sub> | ~2.0                      | 810                      | 84,000                            | 110                                      | 5.00                                                                  | Ref. 9    |
